# Supplementary material for: Enhanced Photocurrent of the Ag Interfaced Topological Insulator Bi2Se3 under UV- and Visible-Light Radiations
Source: MDPI journal article supplement (doi:10.3390/nano11123353), 2021-12-10
Supplement: s1 [file s1]

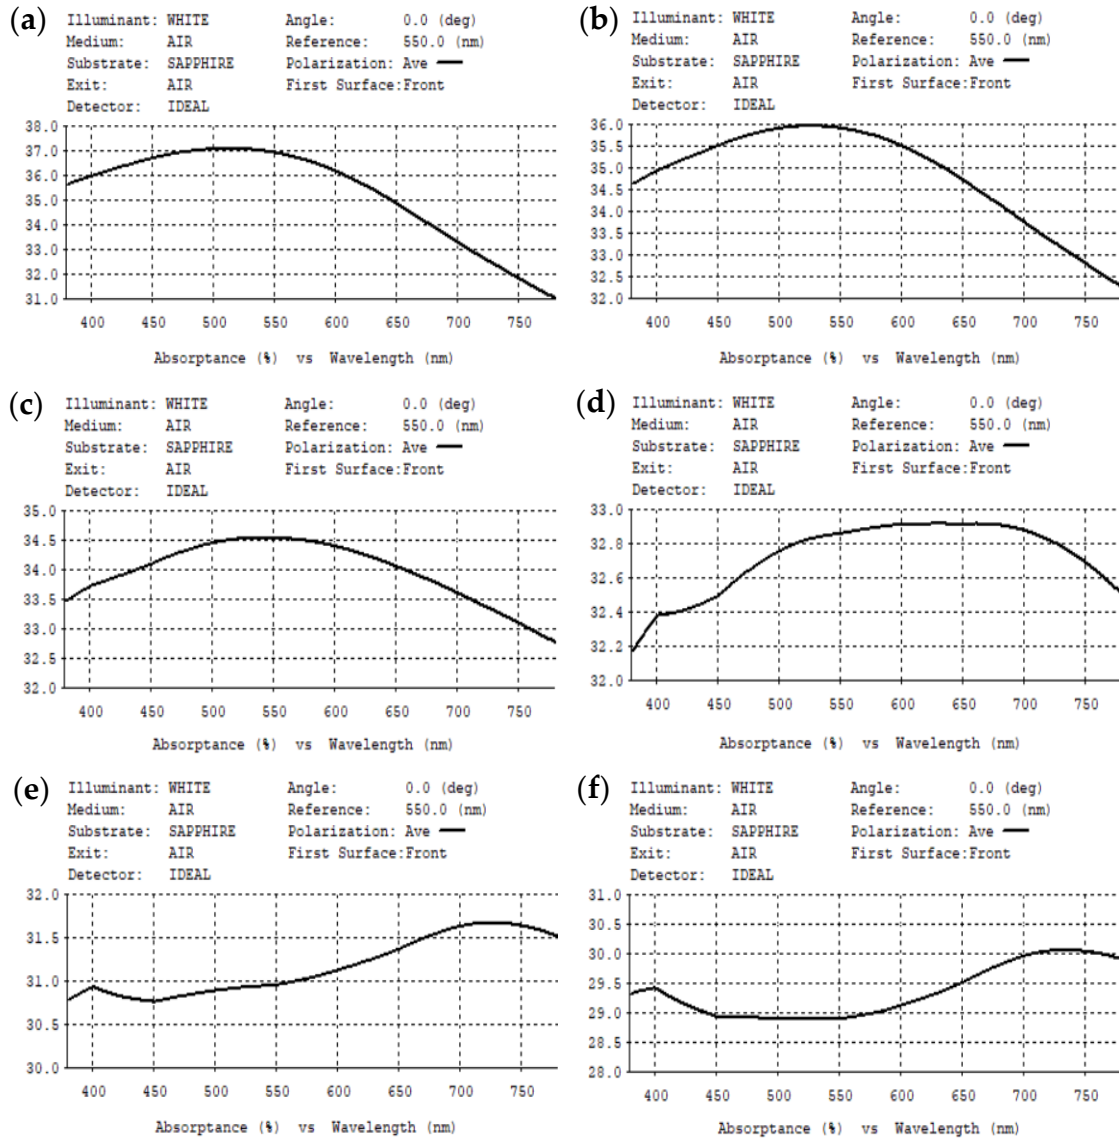

**Figure S1.** (a–f) are the simulated absorptance spectra of the Ag@Bi<sub>2</sub>Se<sub>3</sub> thin film while Ag thin film at 0, 2, 4, 6, 8, and 10 nm.

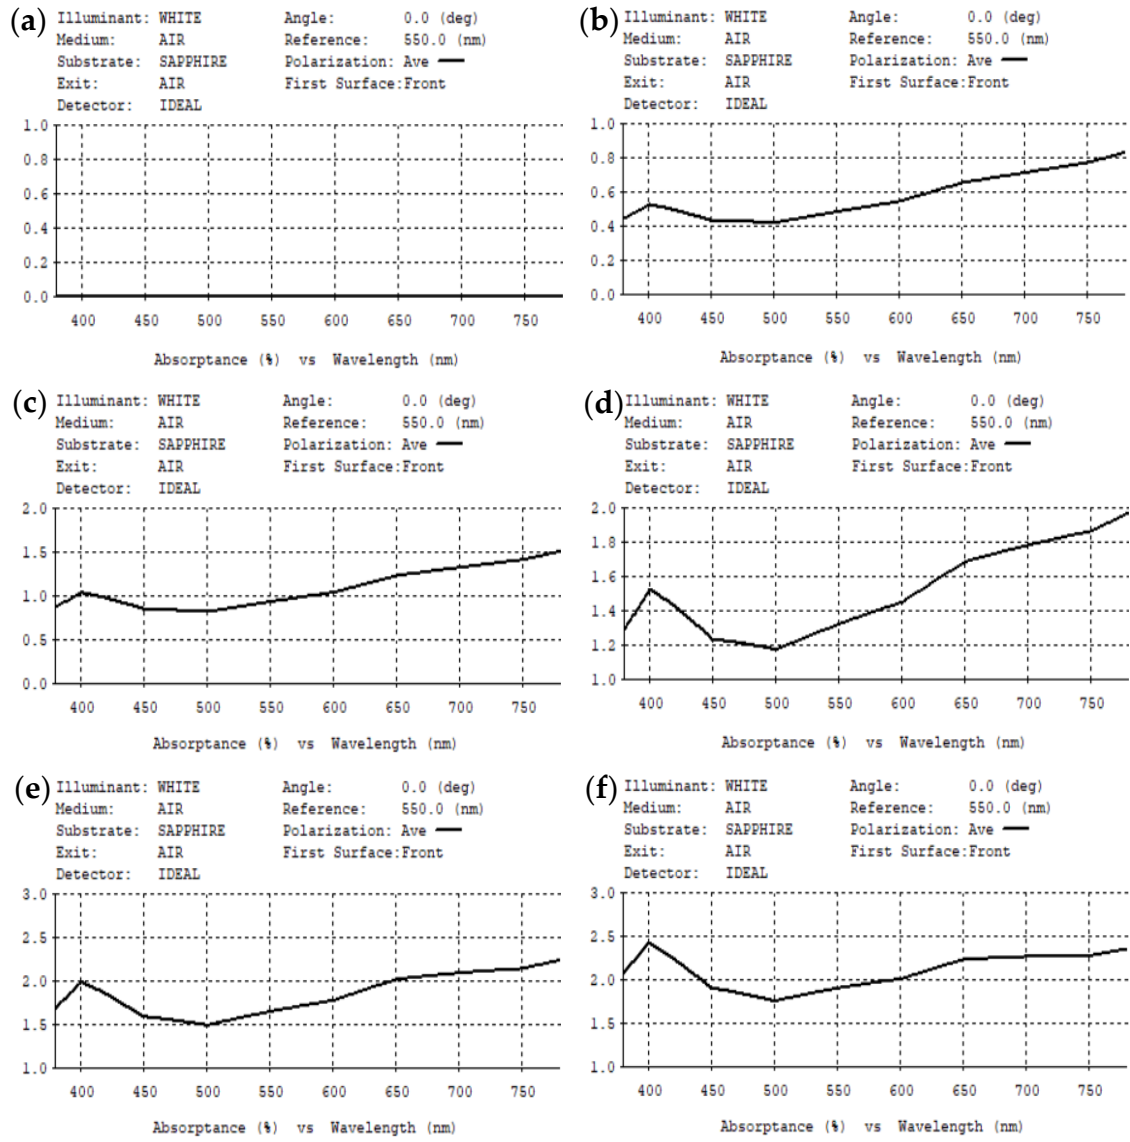

**Figure S2.** (a–f) are the simulated absorptance spectra of Ag thin film in 0, 2, 4, 6, 8, and 10 nm.
